# Supplementary material
Source: publisher figshare collection journal article supplement (https://acs.figshare.com/ndownloader/files/4355971)
Supplement: Supplementary file 1 [file 4355971]

 
data_100521_ygw511_18 
 
_audit_creation_method            SHELXL-97 
_chemical_name_systematic 
; 
 ? 
; 
_chemical_name_common             ? 
_chemical_melting_point           ? 
_chemical_formula_moiety           'C32 H32 N O4 P'  
_chemical_formula_sum 
 'C32 H32 N O4 P' 
_chemical_formula_weight          525.56 
 
loop_ 
 _atom_type_symbol 
 _atom_type_description 
 _atom_type_scat_dispersion_real 
 _atom_type_scat_dispersion_imag 
 _atom_type_scat_source 
 'C'  'C'   0.0033   0.0016 
 'International Tables Vol C Tables 4.2.6.8 and 6.1.1.4' 
 'H'  'H'   0.0000   0.0000 
 'International Tables Vol C Tables 4.2.6.8 and 6.1.1.4' 
 'N'  'N'   0.0061   0.0033 
 'International Tables Vol C Tables 4.2.6.8 and 6.1.1.4' 
 'P'  'P'   0.1023   0.0942 
 'International Tables Vol C Tables 4.2.6.8 and 6.1.1.4' 
 'O'  'O'   0.0106   0.0060 
 'International Tables Vol C Tables 4.2.6.8 and 6.1.1.4' 
 
_symmetry_cell_setting            'Triclinic' 
_symmetry_space_group_name_H-M    'P -1' 
_symmetry_space_group_name_Hall   '-P 1'
 
loop_ 
 _symmetry_equiv_pos_as_xyz 
 'x, y, z' 
 '-x, -y, -z' 
 
_cell_length_a                    9.8093(8) 
_cell_length_b                    12.2537(7) 
_cell_length_c                    12.4626(9) 
_cell_angle_alpha                 88.876(5) 
_cell_angle_beta                  76.621(6) 
_cell_angle_gamma                 82.373(6) 
_cell_volume                      1444.37(18) 
_cell_formula_units_Z             2 
_cell_measurement_temperature     293(2) 
_cell_measurement_reflns_used   2784
_cell_measurement_theta_min     3.2993
_cell_measurement_theta_max     29.3170
 
_exptl_crystal_description       block
_exptl_crystal_colour             yellow
_exptl_crystal_size_max           0.34
_exptl_crystal_size_mid           0.32
_exptl_crystal_size_min          0.24
_exptl_crystal_density_meas       ? 
_exptl_crystal_density_diffrn     1.208 
_exptl_crystal_density_method     'not measured' 
_exptl_crystal_F_000              556 
_exptl_absorpt_coefficient_mu     0.131 
_exptl_absorpt_correction_type    multi-scan'  
_exptl_absorpt_correction_T_min   0.956 
_exptl_absorpt_correction_T_max   0.969
_exptl_absorpt_process_details    
;
CrysAlisPro, Oxford Diffraction Ltd.,
Version 1.171.33.53 (release 17-11-2009 CrysAlis171 .NET)
(compiled Nov 17 2009,16:58:22)
Empirical absorption correction using spherical harmonics,
 implemented in SCALE3 ABSPACK scaling algorithm.
;
 
_exptl_special_details 
; 
 ? 
; 
 
_diffrn_ambient_temperature       293(2) 
_diffrn_radiation_wavelength      0.71073 
_diffrn_radiation_type            MoK\a 
_diffrn_radiation_source          'fine-focus sealed tube' 
_diffrn_radiation_monochromator   graphite 
_diffrn_measurement_device_type   'Xcalibur, Atlas, Gemini ultra' 
_diffrn_measurement_method        '\w scans' 
_diffrn_detector_area_resol_mean  10.3592 
_diffrn_standards_number          ? 
_diffrn_standards_interval_count  ? 
_diffrn_standards_interval_time   ? 
_diffrn_standards_decay_%         ? 
_diffrn_reflns_number             11705 
_diffrn_reflns_av_R_equivalents   0.0382 
_diffrn_reflns_av_sigmaI/netI     0.0861 
_diffrn_reflns_limit_h_min        -11 
_diffrn_reflns_limit_h_max        9 
_diffrn_reflns_limit_k_min        -14 
_diffrn_reflns_limit_k_max        14 
_diffrn_reflns_limit_l_min        -14 
_diffrn_reflns_limit_l_max        15 
_diffrn_reflns_theta_min          3.31 
_diffrn_reflns_theta_max          25.34 
_reflns_number_total              5278 
_reflns_number_gt                 2474 
_reflns_threshold_expression      >2sigma(I) 
 
_computing_cell_refinement        
;
CrysAlisPro, Oxford Diffraction Ltd.,
Version 1.171.33.52 (release 06-11-2009 CrysAlis171 .NET)
(compiled Nov  6 2009,16:24:50)
;
_computing_data_collection        
;
CrysAlisPro, Oxford Diffraction Ltd.,
Version 1.171.33.52 (release 06-11-2009 CrysAlis171 .NET)
(compiled Nov  6 2009,16:24:50)
;
_computing_data_reduction         
;
CrysAlisPro, Oxford Diffraction Ltd.,
Version 1.171.33.52 (release 06-11-2009 CrysAlis171 .NET)
(compiled Nov  6 2009,16:24:50)
;
_computing_molecular_graphics     
;
 OLEX2: a complete structure solution, refinement and analysis program.
 Dolomanov et al., J. Appl. Cryst. (2009). 42, 339-341
;
_computing_publication_material   
;
 OLEX2: a complete structure solution, refinement and analysis program.
 Dolomanov et al., J. Appl. Cryst. (2009). 42, 339-341
;
 
_refine_special_details 
; 
 Refinement of F^2^ against ALL reflections.  The weighted R-factor wR and 
 goodness of fit S are based on F^2^, conventional R-factors R are based 
 on F, with F set to zero for negative F^2^. The threshold expression of 
 F^2^ > 2sigma(F^2^) is used only for calculating R-factors(gt) etc. and is 
 not relevant to the choice of reflections for refinement.  R-factors based 
 on F^2^ are statistically about twice as large as those based on F, and R- 
 factors based on ALL data will be even larger. 
; 
 
_refine_ls_structure_factor_coef  Fsqd  
_refine_ls_matrix_type            full 
_refine_ls_weighting_scheme       calc  
_refine_ls_weighting_details 
 'calc w=1/[\s^2^(Fo^2^)+(0.0735P)^2^+0.0000P] where P=(Fo^2^+2Fc^2^)/3' 
_atom_sites_solution_primary      direct 
_atom_sites_solution_secondary    difmap 
_atom_sites_solution_hydrogens    geom 
_refine_ls_hydrogen_treatment     constr 
_refine_ls_extinction_method      none 
_refine_ls_extinction_coef        ? 
_refine_ls_number_reflns          5278 
_refine_ls_number_parameters      346 
_refine_ls_number_restraints      0 
_refine_ls_R_factor_all           0.1279 
_refine_ls_R_factor_gt            0.0520 
_refine_ls_wR_factor_ref          0.1435 
_refine_ls_wR_factor_gt           0.1227 
_refine_ls_goodness_of_fit_ref    0.876 
_refine_ls_restrained_S_all       0.876 
_refine_ls_shift/su_max           0.001 
_refine_ls_shift/su_mean          0.000 
 
loop_ 
 _atom_site_label 
 _atom_site_type_symbol 
 _atom_site_fract_x 
 _atom_site_fract_y 
 _atom_site_fract_z 
 _atom_site_U_iso_or_equiv 
 _atom_site_adp_type 
 _atom_site_occupancy 
 _atom_site_symmetry_multiplicity 
 _atom_site_calc_flag 
 _atom_site_refinement_flags 
 _atom_site_disorder_assembly 
 _atom_site_disorder_group 
P P 0.95346(10) 0.68171(7) 0.03435(6) 0.0689(3) Uani 1 1 d . . . 
O1 O 0.8593(2) 0.46188(13) 0.29972(15) 0.0715(6) Uani 1 1 d . . . 
O2 O 1.0819(3) 0.7462(2) 0.03216(18) 0.0978(7) Uani 1 1 d . . . 
O3 O 0.9639(2) 0.61406(15) -0.06272(15) 0.0851(7) Uani 1 1 d . . . 
O4 O 0.8399(3) 0.78554(15) 0.05311(16) 0.0804(6) Uani 1 1 d . . . 
N N 0.9273(3) 0.60737(17) 0.14564(17) 0.0629(6) Uani 1 1 d . . . 
H H 0.9341 0.5375 0.1350 0.075 Uiso 1 1 calc R . . 
C1 C 0.5842(4) 1.0282(3) 0.6383(3) 0.0809(9) Uani 1 1 d . . . 
H1 H 0.5565 0.9599 0.6293 0.097 Uiso 1 1 calc R . . 
C2 C 0.4946(4) 1.1214(4) 0.6286(3) 0.1048(12) Uani 1 1 d . . . 
H2 H 0.4081 1.1160 0.6119 0.126 Uiso 1 1 calc R . . 
C3 C 0.5323(5) 1.2222(3) 0.6433(3) 0.1012(12) Uani 1 1 d . . . 
H3 H 0.4709 1.2857 0.6380 0.121 Uiso 1 1 calc R . . 
C4 C 0.6609(5) 1.2297(3) 0.6660(3) 0.0853(10) Uani 1 1 d . . . 
H4 H 0.6875 1.2984 0.6751 0.102 Uiso 1 1 calc R . . 
C5 C 0.7512(3) 1.1352(2) 0.6753(2) 0.0661(8) Uani 1 1 d . . . 
H5 H 0.8380 1.1410 0.6912 0.079 Uiso 1 1 calc R . . 
C6 C 0.7147(3) 1.0323(2) 0.6612(2) 0.0543(7) Uani 1 1 d . . . 
C7 C 0.8140(3) 0.9299(2) 0.66391(19) 0.0507(7) Uani 1 1 d . . . 
C8 C 0.9507(3) 0.93547(18) 0.6954(2) 0.0508(7) Uani 1 1 d . . . 
C9 C 0.9569(4) 0.9637(3) 0.8005(2) 0.0810(9) Uani 1 1 d . . . 
H9 H 0.8735 0.9820 0.8536 0.097 Uiso 1 1 calc R . . 
C10 C 1.0837(5) 0.9652(3) 0.8278(3) 0.0972(11) Uani 1 1 d . . . 
H10 H 1.0857 0.9847 0.8991 0.117 Uiso 1 1 calc R . . 
C11 C 1.2076(4) 0.9383(3) 0.7512(4) 0.0846(10) Uani 1 1 d . . . 
H11 H 1.2937 0.9379 0.7705 0.101 Uiso 1 1 calc R . . 
C12 C 1.2036(4) 0.9121(2) 0.6463(3) 0.0762(9) Uani 1 1 d . . . 
H12 H 1.2874 0.8953 0.5931 0.091 Uiso 1 1 calc R . . 
C13 C 1.0761(3) 0.9104(2) 0.6188(2) 0.0618(8) Uani 1 1 d . . . 
H13 H 1.0746 0.8919 0.5471 0.074 Uiso 1 1 calc R . . 
C14 C 0.7893(3) 0.8339(2) 0.6332(2) 0.0554(7) Uani 1 1 d . . . 
C15 C 0.7660(3) 0.7392(2) 0.5986(2) 0.0506(7) Uani 1 1 d . . . 
C16 C 0.6899(3) 0.6632(2) 0.6796(2) 0.0542(7) Uani 1 1 d . . . 
C17 C 0.5634(3) 0.6324(3) 0.6689(3) 0.0754(9) Uani 1 1 d . . . 
H17 H 0.5238 0.6610 0.6117 0.090 Uiso 1 1 calc R . . 
C18 C 0.4945(4) 0.5600(3) 0.7414(3) 0.0905(10) Uani 1 1 d . . . 
H18 H 0.4092 0.5403 0.7329 0.109 Uiso 1 1 calc R . . 
C19 C 0.5519(5) 0.5173(3) 0.8257(3) 0.0909(11) Uani 1 1 d . . . 
H19 H 0.5069 0.4674 0.8739 0.109 Uiso 1 1 calc R . . 
C20 C 0.6752(5) 0.5482(3) 0.8386(3) 0.0940(11) Uani 1 1 d . . . 
H20 H 0.7132 0.5207 0.8970 0.113 Uiso 1 1 calc R . . 
C21 C 0.7443(3) 0.6200(2) 0.7657(2) 0.0734(9) Uani 1 1 d . . . 
H21 H 0.8292 0.6396 0.7751 0.088 Uiso 1 1 calc R . . 
C22 C 0.8139(3) 0.70561(19) 0.4808(2) 0.0461(6) Uani 1 1 d . . . 
C23 C 0.8562(3) 0.7796(2) 0.3991(2) 0.0546(7) Uani 1 1 d . . . 
H23 H 0.8577 0.8522 0.4186 0.065 Uiso 1 1 calc R . . 
C24 C 0.8963(3) 0.7489(2) 0.2892(2) 0.0579(7) Uani 1 1 d . . . 
H24 H 0.9247 0.8010 0.2362 0.069 Uiso 1 1 calc R . . 
C25 C 0.8949(3) 0.6423(2) 0.2567(2) 0.0503(7) Uani 1 1 d . . . 
C26 C 0.8569(3) 0.56575(19) 0.3385(2) 0.0492(7) Uani 1 1 d . . . 
C27 C 0.8173(3) 0.59674(19) 0.4484(2) 0.0507(7) Uani 1 1 d . . . 
H27 H 0.7926 0.5442 0.5017 0.061 Uiso 1 1 calc R . . 
C28 C 0.8441(4) 0.3756(2) 0.3759(3) 0.0928(11) Uani 1 1 d . . . 
H28A H 0.8587 0.3066 0.3369 0.139 Uiso 1 1 calc R . . 
H28B H 0.7507 0.3861 0.4228 0.139 Uiso 1 1 calc R . . 
H28C H 0.9126 0.3751 0.4199 0.139 Uiso 1 1 calc R . . 
C29 C 0.6983(5) 0.7755(3) 0.0586(4) 0.1237(15) Uani 1 1 d . . . 
H29B H 0.6581 0.7417 0.1276 0.148 Uiso 1 1 calc R . . 
H29A H 0.6919 0.7285 -0.0013 0.148 Uiso 1 1 calc R . . 
C30 C 0.6174(5) 0.8855(3) 0.0506(5) 0.1512(19) Uani 1 1 d . . . 
H30B H 0.6314 0.9066 -0.0253 0.227 Uiso 1 1 calc R . . 
H30C H 0.6497 0.9386 0.0912 0.227 Uiso 1 1 calc R . . 
H30A H 0.5186 0.8825 0.0809 0.227 Uiso 1 1 calc R . . 
C31 C 1.2156(6) 0.7042(4) -0.0283(5) 0.166(2) Uani 1 1 d . . . 
H31B H 1.2164 0.7072 -0.1063 0.199 Uiso 1 1 calc R . . 
H31A H 1.2364 0.6276 -0.0094 0.199 Uiso 1 1 calc R . . 
C32 C 1.3226(5) 0.7638(4) -0.0079(5) 0.1533(19) Uani 1 1 d . . . 
H32C H 1.4103 0.7403 -0.0596 0.230 Uiso 1 1 calc R . . 
H32A H 1.3340 0.7500 0.0658 0.230 Uiso 1 1 calc R . . 
H32B H 1.2957 0.8411 -0.0163 0.230 Uiso 1 1 calc R . . 
 
loop_ 
 _atom_site_aniso_label 
 _atom_site_aniso_U_11 
 _atom_site_aniso_U_22 
 _atom_site_aniso_U_33 
 _atom_site_aniso_U_23 
 _atom_site_aniso_U_13 
 _atom_site_aniso_U_12 
P 0.0863(7) 0.0673(5) 0.0495(5) -0.0091(4) -0.0155(4) 0.0039(5) 
O1 0.1091(17) 0.0400(11) 0.0646(12) -0.0098(9) -0.0145(11) -0.0150(10) 
O2 0.0878(19) 0.1110(18) 0.0866(16) -0.0154(13) 0.0047(13) -0.0260(15) 
O3 0.127(2) 0.0754(13) 0.0492(12) -0.0149(10) -0.0258(12) 0.0137(13) 
O4 0.0976(19) 0.0697(14) 0.0740(14) -0.0104(10) -0.0283(13) 0.0050(13) 
N 0.0898(18) 0.0487(13) 0.0500(14) -0.0106(10) -0.0163(12) -0.0064(12) 
C1 0.067(2) 0.073(2) 0.100(3) -0.0097(18) -0.0139(19) -0.0082(19) 
C2 0.074(3) 0.102(3) 0.133(3) -0.012(2) -0.027(2) 0.015(3) 
C3 0.096(3) 0.086(3) 0.105(3) -0.003(2) -0.013(2) 0.030(2) 
C4 0.103(3) 0.058(2) 0.084(2) -0.0109(16) -0.006(2) 0.001(2) 
C5 0.076(2) 0.0561(19) 0.0618(19) -0.0057(14) -0.0115(16) -0.0016(17) 
C6 0.059(2) 0.0565(18) 0.0435(16) -0.0070(12) -0.0016(13) -0.0084(15) 
C7 0.0603(19) 0.0490(17) 0.0395(15) -0.0081(12) -0.0021(13) -0.0103(14) 
C8 0.063(2) 0.0378(14) 0.0498(17) -0.0041(12) -0.0077(15) -0.0103(13) 
C9 0.074(2) 0.109(3) 0.060(2) -0.0153(17) -0.0117(17) -0.0155(19) 
C10 0.103(3) 0.126(3) 0.075(3) -0.003(2) -0.039(3) -0.028(2) 
C11 0.076(3) 0.083(2) 0.106(3) 0.021(2) -0.036(2) -0.0250(19) 
C12 0.068(2) 0.065(2) 0.089(3) 0.0104(17) -0.0046(19) -0.0112(16) 
C13 0.067(2) 0.0531(17) 0.0614(19) -0.0034(13) -0.0054(17) -0.0093(15) 
C14 0.0604(19) 0.0578(19) 0.0462(16) -0.0043(13) -0.0080(13) -0.0077(14) 
C15 0.0546(18) 0.0492(16) 0.0501(16) -0.0056(13) -0.0163(13) -0.0058(13) 
C16 0.0577(19) 0.0529(16) 0.0514(17) -0.0101(13) -0.0113(14) -0.0059(14) 
C17 0.068(2) 0.090(2) 0.073(2) 0.0085(18) -0.0210(17) -0.0197(19) 
C18 0.072(2) 0.110(3) 0.093(3) -0.001(2) -0.011(2) -0.037(2) 
C19 0.108(3) 0.088(2) 0.073(2) 0.0135(18) -0.003(2) -0.031(2) 
C20 0.113(3) 0.100(3) 0.072(2) 0.025(2) -0.027(2) -0.022(2) 
C21 0.080(2) 0.078(2) 0.069(2) 0.0098(17) -0.0286(18) -0.0182(18) 
C22 0.0512(17) 0.0417(15) 0.0479(16) -0.0067(12) -0.0163(12) -0.0049(12) 
C23 0.074(2) 0.0382(14) 0.0548(18) -0.0051(13) -0.0203(14) -0.0081(13) 
C24 0.079(2) 0.0458(16) 0.0504(17) 0.0015(13) -0.0150(14) -0.0140(14) 
C25 0.0610(18) 0.0453(16) 0.0460(16) -0.0072(13) -0.0156(13) -0.0051(13) 
C26 0.0554(18) 0.0395(15) 0.0551(17) -0.0085(13) -0.0170(13) -0.0063(12) 
C27 0.0605(18) 0.0414(15) 0.0519(17) 0.0021(12) -0.0162(13) -0.0074(13) 
C28 0.144(3) 0.0417(17) 0.098(3) 0.0010(17) -0.038(2) -0.0159(19) 
C29 0.090(3) 0.112(3) 0.171(4) -0.036(3) -0.028(3) -0.016(3) 
C30 0.116(4) 0.101(3) 0.241(6) 0.008(3) -0.070(4) 0.020(3) 
C31 0.101(4) 0.128(4) 0.256(7) -0.025(4) -0.016(4) -0.008(3) 
C32 0.100(4) 0.152(4) 0.214(6) -0.026(4) -0.048(4) -0.013(3) 
 
_geom_special_details 
; 
 All esds (except the esd in the dihedral angle between two l.s. planes) 
 are estimated using the full covariance matrix.  The cell esds are taken 
 into account individually in the estimation of esds in distances, angles 
 and torsion angles; correlations between esds in cell parameters are only 
 used when they are defined by crystal symmetry.  An approximate (isotropic) 
 treatment of cell esds is used for estimating esds involving l.s. planes. 
; 
 
loop_ 
 _geom_bond_atom_site_label_1 
 _geom_bond_atom_site_label_2 
 _geom_bond_distance 
 _geom_bond_site_symmetry_2 
 _geom_bond_publ_flag 
P O3 1.4563(18) . ? 
P O4 1.559(2) . ? 
P O2 1.569(2) . ? 
P N 1.633(2) . ? 
O1 C26 1.366(3) . ? 
O1 C28 1.407(3) . ? 
O2 C31 1.390(5) . ? 
O4 C29 1.396(4) . ? 
N C25 1.409(3) . ? 
N H 0.8600 . ? 
C1 C2 1.367(4) . ? 
C1 C6 1.382(4) . ? 
C1 H1 0.9300 . ? 
C2 C3 1.363(5) . ? 
C2 H2 0.9300 . ? 
C3 C4 1.370(5) . ? 
C3 H3 0.9300 . ? 
C4 C5 1.381(4) . ? 
C4 H4 0.9300 . ? 
C5 C6 1.380(4) . ? 
C5 H5 0.9300 . ? 
C6 C7 1.488(4) . ? 
C7 C14 1.313(3) . ? 
C7 C8 1.492(4) . ? 
C8 C13 1.373(4) . ? 
C8 C9 1.378(4) . ? 
C9 C10 1.366(4) . ? 
C9 H9 0.9300 . ? 
C10 C11 1.365(5) . ? 
C10 H10 0.9300 . ? 
C11 C12 1.364(4) . ? 
C11 H11 0.9300 . ? 
C12 C13 1.374(4) . ? 
C12 H12 0.9300 . ? 
C13 H13 0.9300 . ? 
C14 C15 1.311(3) . ? 
C15 C22 1.483(3) . ? 
C15 C16 1.497(4) . ? 
C16 C21 1.373(4) . ? 
C16 C17 1.379(4) . ? 
C17 C18 1.381(4) . ? 
C17 H17 0.9300 . ? 
C18 C19 1.367(5) . ? 
C18 H18 0.9300 . ? 
C19 C20 1.358(5) . ? 
C19 H19 0.9300 . ? 
C20 C21 1.378(4) . ? 
C20 H20 0.9300 . ? 
C21 H21 0.9300 . ? 
C22 C23 1.378(3) . ? 
C22 C27 1.395(3) . ? 
C23 C24 1.380(3) . ? 
C23 H23 0.9300 . ? 
C24 C25 1.378(3) . ? 
C24 H24 0.9300 . ? 
C25 C26 1.392(3) . ? 
C26 C27 1.381(3) . ? 
C27 H27 0.9300 . ? 
C28 H28A 0.9600 . ? 
C28 H28B 0.9600 . ? 
C28 H28C 0.9600 . ? 
C29 C30 1.484(5) . ? 
C29 H29B 0.9700 . ? 
C29 H29A 0.9700 . ? 
C30 H30B 0.9600 . ? 
C30 H30C 0.9600 . ? 
C30 H30A 0.9600 . ? 
C31 C32 1.427(6) . ? 
C31 H31B 0.9700 . ? 
C31 H31A 0.9700 . ? 
C32 H32C 0.9600 . ? 
C32 H32A 0.9600 . ? 
C32 H32B 0.9600 . ? 
 
loop_ 
 _geom_angle_atom_site_label_1 
 _geom_angle_atom_site_label_2 
 _geom_angle_atom_site_label_3 
 _geom_angle 
 _geom_angle_site_symmetry_1 
 _geom_angle_site_symmetry_3 
 _geom_angle_publ_flag 
O3 P O4 116.93(12) . . ? 
O3 P O2 115.75(13) . . ? 
O4 P O2 95.43(14) . . ? 
O3 P N 110.41(12) . . ? 
O4 P N 108.27(12) . . ? 
O2 P N 108.97(13) . . ? 
C26 O1 C28 118.4(2) . . ? 
C31 O2 P 119.6(3) . . ? 
C29 O4 P 120.3(2) . . ? 
C25 N P 128.68(17) . . ? 
C25 N H 115.7 . . ? 
P N H 115.7 . . ? 
C2 C1 C6 122.1(3) . . ? 
C2 C1 H1 119.0 . . ? 
C6 C1 H1 119.0 . . ? 
C3 C2 C1 119.8(4) . . ? 
C3 C2 H2 120.1 . . ? 
C1 C2 H2 120.1 . . ? 
C2 C3 C4 119.8(3) . . ? 
C2 C3 H3 120.1 . . ? 
C4 C3 H3 120.1 . . ? 
C3 C4 C5 120.0(3) . . ? 
C3 C4 H4 120.0 . . ? 
C5 C4 H4 120.0 . . ? 
C6 C5 C4 121.1(3) . . ? 
C6 C5 H5 119.5 . . ? 
C4 C5 H5 119.5 . . ? 
C5 C6 C1 117.2(3) . . ? 
C5 C6 C7 121.9(3) . . ? 
C1 C6 C7 120.8(3) . . ? 
C14 C7 C6 122.0(3) . . ? 
C14 C7 C8 117.9(2) . . ? 
C6 C7 C8 119.9(2) . . ? 
C13 C8 C9 117.8(3) . . ? 
C13 C8 C7 119.9(2) . . ? 
C9 C8 C7 122.3(3) . . ? 
C10 C9 C8 121.0(3) . . ? 
C10 C9 H9 119.5 . . ? 
C8 C9 H9 119.5 . . ? 
C11 C10 C9 120.5(3) . . ? 
C11 C10 H10 119.7 . . ? 
C9 C10 H10 119.7 . . ? 
C12 C11 C10 119.3(3) . . ? 
C12 C11 H11 120.3 . . ? 
C10 C11 H11 120.3 . . ? 
C11 C12 C13 120.2(3) . . ? 
C11 C12 H12 119.9 . . ? 
C13 C12 H12 119.9 . . ? 
C8 C13 C12 121.2(3) . . ? 
C8 C13 H13 119.4 . . ? 
C12 C13 H13 119.4 . . ? 
C15 C14 C7 177.9(3) . . ? 
C14 C15 C22 121.3(2) . . ? 
C14 C15 C16 119.5(2) . . ? 
C22 C15 C16 119.2(2) . . ? 
C21 C16 C17 117.5(3) . . ? 
C21 C16 C15 121.5(3) . . ? 
C17 C16 C15 121.0(2) . . ? 
C16 C17 C18 121.4(3) . . ? 
C16 C17 H17 119.3 . . ? 
C18 C17 H17 119.3 . . ? 
C19 C18 C17 119.8(3) . . ? 
C19 C18 H18 120.1 . . ? 
C17 C18 H18 120.1 . . ? 
C20 C19 C18 119.6(3) . . ? 
C20 C19 H19 120.2 . . ? 
C18 C19 H19 120.2 . . ? 
C19 C20 C21 120.5(3) . . ? 
C19 C20 H20 119.8 . . ? 
C21 C20 H20 119.8 . . ? 
C16 C21 C20 121.2(3) . . ? 
C16 C21 H21 119.4 . . ? 
C20 C21 H21 119.4 . . ? 
C23 C22 C27 117.3(2) . . ? 
C23 C22 C15 121.9(2) . . ? 
C27 C22 C15 120.8(2) . . ? 
C22 C23 C24 121.9(2) . . ? 
C22 C23 H23 119.1 . . ? 
C24 C23 H23 119.1 . . ? 
C25 C24 C23 120.9(2) . . ? 
C25 C24 H24 119.5 . . ? 
C23 C24 H24 119.5 . . ? 
C24 C25 C26 117.9(2) . . ? 
C24 C25 N 123.6(2) . . ? 
C26 C25 N 118.4(2) . . ? 
O1 C26 C27 124.7(2) . . ? 
O1 C26 C25 114.4(2) . . ? 
C27 C26 C25 120.9(2) . . ? 
C26 C27 C22 121.1(2) . . ? 
C26 C27 H27 119.5 . . ? 
C22 C27 H27 119.5 . . ? 
O1 C28 H28A 109.5 . . ? 
O1 C28 H28B 109.5 . . ? 
H28A C28 H28B 109.5 . . ? 
O1 C28 H28C 109.5 . . ? 
H28A C28 H28C 109.5 . . ? 
H28B C28 H28C 109.5 . . ? 
O4 C29 C30 110.2(3) . . ? 
O4 C29 H29B 109.6 . . ? 
C30 C29 H29B 109.6 . . ? 
O4 C29 H29A 109.6 . . ? 
C30 C29 H29A 109.6 . . ? 
H29B C29 H29A 108.1 . . ? 
C29 C30 H30B 109.5 . . ? 
C29 C30 H30C 109.5 . . ? 
H30B C30 H30C 109.5 . . ? 
C29 C30 H30A 109.5 . . ? 
H30B C30 H30A 109.5 . . ? 
H30C C30 H30A 109.5 . . ? 
O2 C31 C32 112.1(4) . . ? 
O2 C31 H31B 109.2 . . ? 
C32 C31 H31B 109.2 . . ? 
O2 C31 H31A 109.2 . . ? 
C32 C31 H31A 109.2 . . ? 
H31B C31 H31A 107.9 . . ? 
C31 C32 H32C 109.5 . . ? 
C31 C32 H32A 109.5 . . ? 
H32C C32 H32A 109.5 . . ? 
C31 C32 H32B 109.5 . . ? 
H32C C32 H32B 109.5 . . ? 
H32A C32 H32B 109.5 . . ? 
 
_diffrn_measured_fraction_theta_max    0.998 
_diffrn_reflns_theta_full              25.34 
_diffrn_measured_fraction_theta_full   0.998 
_refine_diff_density_max    0.269 
_refine_diff_density_min   -0.265 
_refine_diff_density_rms    0.039 
